# Supplementary material for: Frailty as a Risk Factor for Cardiovascular Versus Noncardiovascular Mortality in Older Men: Results From the MrOS Sleep (Outcomes of Sleep Disorders in Older Men) Study
Source: PubMed Central journal article supplement — J Am Heart Assoc. 2018 May 4;7(10):e008974. doi: 10.1161/JAHA.118.008974 (PMC6015334; doi:10.1161/jaha.118.008974), 2018-05-04
Supplement: JAH3-7-e008974-s001.pdf [file JAH3-7-e008974-s001.pdf]

# **SUPPLEMENTAL MATERIAL**

**Table S1. Characteristics of men who died due to CVD versus non-CVD causes.**

| Characteristic                     | CVD death<br>(N=445) | Non-CVD<br>death<br>(N=828) | P-value<br>CVD vs. non-CVD |
|------------------------------------|----------------------|-----------------------------|----------------------------|
| Age, years, mean (SD)              | 79.6(5.6)            | 78.8(5.7)                   | 0.02                       |
| Caucasian race, n (%)              | 412(92.6%)           | 756(91.3%)                  | 0.43                       |
| Robust, n (%)                      | 81(18.2%)            | 158(19.1%)                  | 0.39                       |
| Pre-frail, n (%)                   | 242(54.4%)           | 472(57.0%)                  |                            |
| Frail, n (%)                       | 122(27.4%)           | 198(23.9%)                  |                            |
| Smoking status                     |                      |                             | 0.06                       |
| Never                              | 164(36.9%)           | 302(36.5%)                  |                            |
| Former                             | 277(62.2%)           | 501(60.6%)                  |                            |
| Current                            | 4(0.9%)              | 24(2.9%)                    |                            |
| Selected medical conditions, n (%) |                      |                             |                            |
| Stroke                             | 27(6.1%)             | 44(5.3%)                    | 0.58                       |
| Diabetes mellitus                  | 85(19.1%)            | 122(14.8%)                  | 0.05                       |
| Hypertension                       | 347(78.0%)           | 508(61.4%)                  | <0.0001                    |
| Coronary heart disease*            | 212(47.6%)           | 286(34.5%)                  | <0.0001                    |
| Peripheral vascular disease†       | 63(14.2%)            | 95(11.5%)                   | 0.17                       |
| Valvular heart disease‡            | 21(4.7%)             | 31(3.7%)                    | 0.40                       |
| Congestive heart failure           | 66(14.8%)            | 55(6.7%)                    | <0.0001                    |
| Cancer                             | 127(28.5%)           | 293(35.4%)                  | 0.01                       |
| CKD                                | 195(45.2%)           | 303(38.1%)                  | 0.02                       |
| COPD                               | 23(5.2%)             | 65(7.9%)                    | 0.07                       |

Abbreviations: COPD, chronic obstructive pulmonary disease; CKD= chronic kidney disease (estimated glomerular filtration rate < 60 ml/min)

\*including myocardial infarction, bypass surgery, coronary angioplasty or angina

†including claudication, repair of abdominal aortic aneurysm, peripheral bypass

‡including heart valve replacement
